# Desmosomes at a glance

**Bhushan V. Desai, Robert M. Harmon and Kathleen J. Green\***

Departments of Pathology, Dermatology and the R. H. Lurie Comprehensive Cancer Center, Northwestern University Feinberg School of Medicine, 60611 Chicago, IL, USA

\*Corresponding author (kgreen@northwestern.edu)

*Journal of Cell Science* 122, 4401-4407  
 Published by The Company of Biologists 2009  
 doi: 10.1242/jcs.037457

Desmosomes are one of four intercellular junctions present on the lateral side of neighboring polarized epithelial cells. Tight junctions and adherens junctions (AJs) are restricted to the apical domain, where they form the epithelial barrier and organize cortical actin, respectively. Desmosomes are found subjacent to the AJs and are more widely distributed along

the lateral membranes. By tethering the intermediate filament (IF) cytoskeleton to the plasma membrane, these strongly adhesive junctions further enhance their force-resisting mechanical properties (see Poster, panels 1 and 3). Interspersed among desmosomes are 'communicating' or gap junctions that chemically and electrically couple cells. Desmosomes confer stability to tissues that experience mechanical stress such as the epidermis and heart, and are also found in more specialized junctions of the meninges and lymphatic endothelial cells (reviewed by Getsios et al., 2004; Green and Simpson, 2007; Holthofer et al., 2007).

It has recently emerged that desmosomal cadherins and their associated proteins play a role in instructing the development and differentiation of complex tissues in vertebrates. In addition, they are frequently mutated in inherited diseases of the skin and heart and are targeted by autoimmune antibodies and

bacterial toxins, the latter of which can result in blistering of complex epithelia (McGrath, 2005; Waschke, 2008). This Cell Science at a Glance article and its accompanying poster highlight key aspects of desmosome structure, function and regulation, and relate this knowledge to recent advances in our understanding of the role of desmosomes in human disease. Interested readers are referred to more comprehensive recent reviews for further details (Bazzi and Christiano, 2007; Dusek et al., 2007; Garrod and Chidgey, 2008; Getsios et al., 2004; Green and Simpson, 2007; Holthofer et al., 2007; Huber, 2003; McGrath, 2005; Schmidt and Koch, 2007; Waschke, 2008).

## Desmosomes are highly organized cadherin-based intercellular junctions

At the ultrastructural level, desmosomes appear as multi-layered, bilaterally symmetrical structures featuring a pair of electron-dense plaques that sandwich an extracellular region of

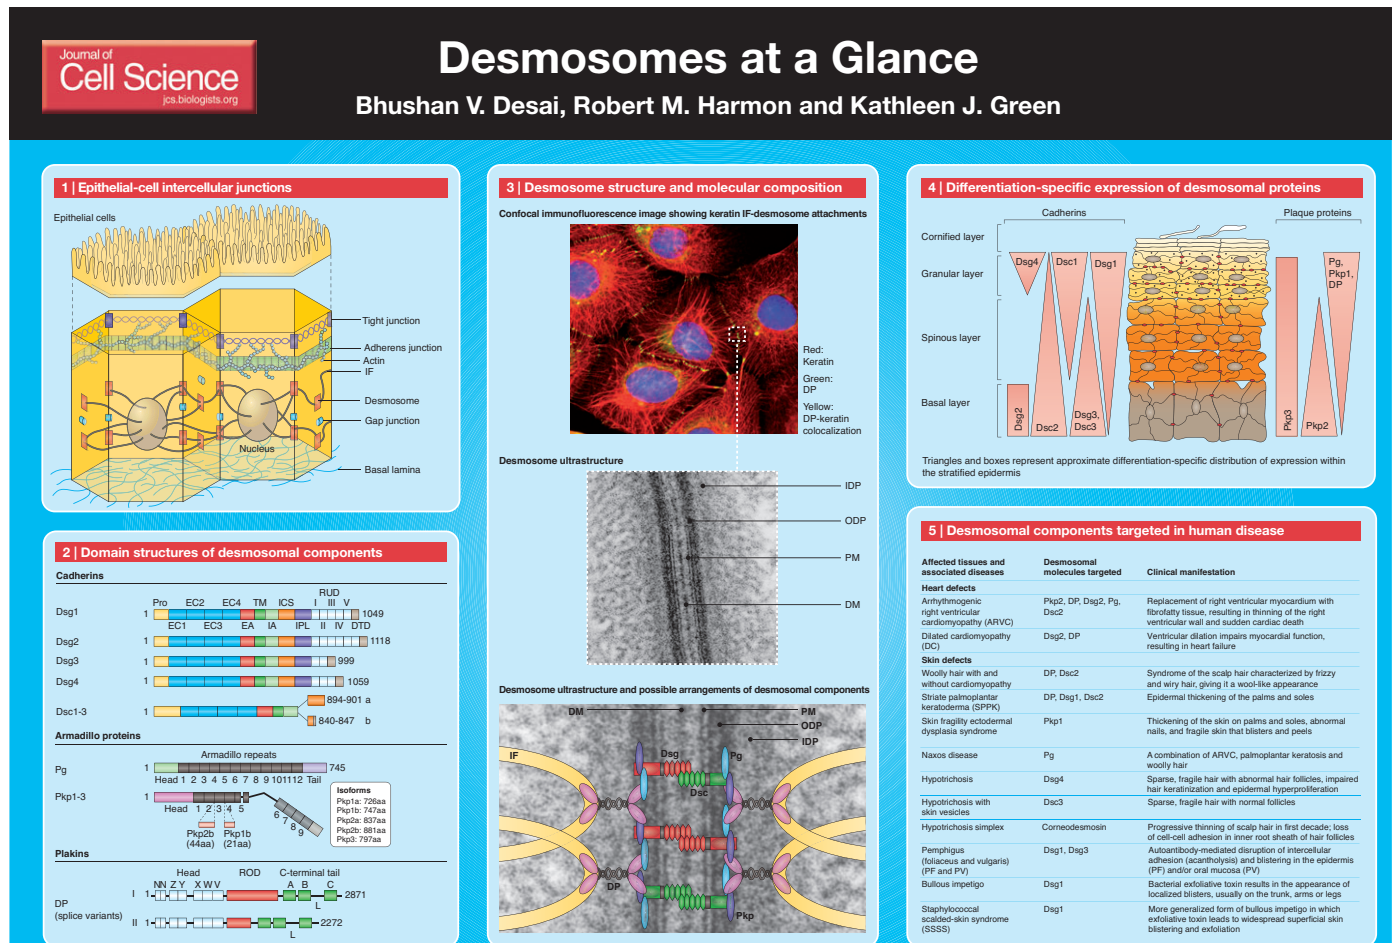

**Abbreviations:** DM, dense midline; DP, desmoplakin; Dsc, desmocollin; Dsg, desmoglein; DTD, desmoglein terminal domain; EA, extracellular anchor domain; EC, extracellular repeat domain; IA, intracellular anchor; ICS, intracellular caspase-binding region; IDP, inner dense plaque; IF, intermediate filament; IPL, intracellular proline-rich linker; ODP, outer dense plaque; Pg, plakoglobin; Pkp, plakophilin; PM, plasma membrane; Pro, propeptide; RUD, repeat unit domain; TM, transmembrane domain.

See accompanying article for Table citations. Immunofluorescence image in panel 3 reproduced from Green and Gaudy (Green and Gaudy, 2000) with permission. Electron microscopy image in panel 3 reproduced from Kowalczyk et al. (Kowalczyk et al., 1994) with permission. Figure in panel 4 modified from Green and Gaudy (Green and Gaudy, 2000) with permission. See accompanying article for full citations.

~35 nm in width. This extracellular space is bisected by a central dense line (dense midline) comprising the desmosomal cadherin ectodomains (see Poster, panel 3). The major components of desmosomes come from three protein families: cadherins, armadillo proteins and plakins (see Poster, panels 2 and 3). On the extracellular face of the plasma membrane, the desmosomal cadherins engage in calcium ( $\text{Ca}^{2+}$ )-dependent adhesive interactions, whereas on the cytoplasmic side, they are indirectly linked to the IF cytoskeleton via their interactions with armadillo and plakin family members (see Poster, panel 3). Although a minimal set of these core proteins is required for desmosome formation, additional components tailor desmosomes for specialized functions in a cell-type-specific manner. These additional components include proteins that are required for junction assembly and integrity [such as the p63 effector PERP, p120 catenin and the prion protein PrP(c)], proteins that contribute to the cornified envelope and corneodesmosomes (such as envoplakin, periplakin and corneodesmosin), and proteins involved in cytoskeletal remodeling, differentiation and signaling (such as the periplakin-binding protein kazrin and the ErbB2-binding protein Erbin) (Green and Simpson, 2007; Huber, 2003; Sonnenberg and Liem, 2007).

#### Desmosomal cadherins

Desmosomal cadherins are the desmosome counterparts of the classic cadherins that are present in AJs. They are subdivided into desmogleins 1-4 (Dsg1-Dsg4) and desmocollins 1-3 (Dsc1-Dsc3); the genes encoding these proteins are organized in a tandem array along mouse and human chromosome 18. Whereas Dsg2 and Dsc2 are commonly found in desmosome-containing tissues, Dsg1 and Dsc1 (as well as Dsg3 and Dsc3) are restricted to stratified epithelia, where they are organized in reciprocal overlapping patterns in the upper and lower layers, respectively (see Poster, panel 4). Dsg4 is also expressed in differentiated layers of the epidermis and associated hair follicles. Desmocollins exist as two splice variants: the more typical type 'a' form and the shorter type 'b' form, which lacks plakoglobin (Pg)-binding ability and is capped with 11 residues in Dsc1 and Dsc2, and eight residues in Dsc3 that are not found in the Dsc type 'a' isoform (see Poster, panel 2).

Dsgs and Dscs are similar to classic cadherins in that they contain a series of highly conserved extracellular repeat (EC) domains, followed by a short transmembrane domain (TM). Whereas classic cadherins interact in a homophilic manner via the exchange of highly conserved tryptophans on adjacent cadherin EC1 ectodomains into the

hydrophobic pockets of their partner, the nature of the interactions that occur between desmosomal cadherins, and their preferred partnerships *in vivo*, are not well understood. Although high-resolution tomographic studies of desmosomes *in situ* revealed a somewhat disordered array of desmosomal cadherin ectodomains, more recent cryoelectron microscopy studies suggest a highly ordered arrangement of cadherins. These findings could help explain the robust adhesive properties of desmosomes *in vivo*. Similar to classic cadherins, the EC1 domain of desmosomal cadherins is crucial for adhesion and might participate in both heterophilic and homophilic interactions. The cytoplasmic domains contain an intracellular anchor (IA), a catenin-binding region (ICS) and, in desmogleins, additional unique domains that include the intracellular proline-rich linker (IPL), variable numbers of repeated unit domains (RUDs) and a desmoglein terminal domain (DTD) (Garrod and Chidgey, 2008; Getsios et al., 2004; Holthofer et al., 2007). Established binding partners for desmosomal cadherins are Pg and plakophilins (Pkps), but the extended, highly divergent desmosomal cadherin tails might provide a docking site for additional structural and signaling proteins (Table 1).

#### Armadillo proteins

Desmosomal armadillo family members include Pg and Pkps 1-3. Similar to their AJ counterparts  $\beta$ -catenin and p120 catenin, Pg and Pkps are also present in the nucleus. Pkp1 and Pkp2 each have two isoforms, the shorter 'a' form and the longer 'b' form, the Pkp1b form being exclusively nuclear. The presence of Pkp2 in the nucleus, where it contributes to the RNA polymerase III holoenzyme complex, is regulated by the 14-3-3 protein. It has been reported that a fourth Pkp-like molecule, known as p0071 (Pkp4), associates with desmosomes and AJs, although recently its desmosomal location has been questioned (Hofmann et al., 2009). Pg comprises 12 central arm repeats, which are flanked by N- and C-terminal domains. By interacting with both the ICS domain of the desmosomal cadherins and the N-terminus of the IF-anchoring protein desmoplakin (DP), Pg is positioned to play a role in linking IFs to the plaque. In addition to its junctional roles, Pg regulates cell growth, survival and differentiation indirectly through its influence on  $\beta$ -catenin signaling, and directly through transcriptional pathways that have yet to be fully elucidated (Hatzfeld, 2007; Holthofer et al., 2007; Keil et al., 2007).

Pkp1 is found only in desmosomes of complex epithelia, whereas Pkp2 and Pkp3 are more widely distributed and are also more promiscuous in their protein partnerships than

Pg. So far, no binding partners for the nine armadillo repeats of the Pkps have been identified, although it is known that their extended N-terminal head domains can associate with DP, multiple desmosomal cadherins, Pg,  $\beta$ -catenin and/or cytokeratins, depending on the Pkp isoform (see Table 1). These numerous partnerships expand the number of lateral interactions that can occur in the plaque. Pkps have been proposed as scaffolds for positioning the regulatory molecules protein kinase C (PKC) and Rho GTPases in locations where they are needed to promote junction assembly and other functions. In response to cellular stress, both Pkp3 and Pkp1 are recruited to granules that are known to accumulate stalled translation initiation complexes, which suggests that Pkps might also have a role in RNA metabolism (Bass-Zubek et al., 2008; Hatzfeld, 2007).

#### Plakins

Plakins are a family of large, modular proteins that link various cytoskeletal elements with each other and with plasma membranes. Of four plakin family members that have been reported to associate with desmosomes (DP, plectin, envoplakin and periplakin), DP is indispensable for desmosome assembly and IF anchorage; DP-deficient mouse embryos do not survive beyond E6.5. DP, which is expressed as two alternatively spliced isoforms (DPI and DPII), is a long dumbbell-shaped molecule that is divided into three domains (see Poster, panel 2): the N-terminal head domain binds to armadillo proteins and to Dsc1a, and targets DP to the desmosomal plaque; the central rod domain is required for DP oligomerization; and the C-terminal domain (comprising three plakin repeats – A, B and C) links the desmosomal complex to the IF cytoskeleton (Garrod and Chidgey, 2008; Holthofer et al., 2007; Sonnenberg and Liem, 2007). The phosphorylation status of the extreme C-terminal region regulates the interaction between DP and IFs (Stappenbeck et al., 1994). In addition to its absolute requirement for maintaining tissue integrity, DP has also been implicated in regulating cellular proliferation by affecting the ERK-Akt signaling pathway (Wan et al., 2007) and in governing the redistribution of microtubules during epidermal differentiation (Lechler and Fuchs, 2007).

#### Desmosomes as dynamic structures Assembly

The dynamic nature of desmosomes is illustrated by live-cell imaging observations in cultured cells, revealing their constant remodeling and the exchange of GFP-labeled desmosome molecules into existing plaques. De

**Table 1. Known binding partners for selected desmosomal proteins**

| Desmosomal proteins  | Binding partners     | Level of evidence | Refs                                                          | Desmosomal proteins   | Binding partners          | Level of evidence                                                                       | Refs                                            |
|----------------------|----------------------|-------------------|---------------------------------------------------------------|-----------------------|---------------------------|-----------------------------------------------------------------------------------------|-------------------------------------------------|
| Desmocollin 1 (Dsc1) | Dsg1                 | IV                | (Kami et al., 2009)                                           | Pg (cont'd)           | Dsc1                      | IP                                                                                      | (Witcher et al., 1996)                          |
|                      | Dsg2                 | IP, IV            | (Chitaeu et al., 1997)                                        |                       | Dsc2                      | IP                                                                                      | (Kowalczyk et al., 1996)                        |
|                      | DP                   | IV                | (Smith and Fuchs, 1998)                                       |                       | Dsc3                      | IP                                                                                      | (Hanakawa et al., 2000)                         |
|                      | Pg                   | Y2H, IP           | (Cheng et al., 2004; Troyanovsky et al., 1994)                |                       | Dsg1                      | IP, IV                                                                                  | (Kowalczyk et al., 1996; Smith and Fuchs, 1998) |
|                      | Pkp1                 | Y2H               | (Cheng et al., 2004)                                          |                       | Dsg2                      | IP, IV                                                                                  | (Bannon et al., 2001; Ozawa et al., 1995)       |
|                      | Pkp2                 | Y2H               | (Chen et al., 2002)                                           |                       | Dsg3                      | IP, IV                                                                                  | (Roh et al., 1995)                              |
|                      | Pkp3                 | Y2H               | (Bonne et al., 2003)                                          |                       | DP                        | Y2H, IP                                                                                 | (Kowalczyk et al., 1997)                        |
| Desmoglein 1 (Dsg1)  | Dsc1                 | IV                | (Kami et al., 2009)                                           | DF3/MUC1              | IP, IV                    | (Yamamoto et al., 1997)                                                                 |                                                 |
|                      | DP                   | IV                | (Kami et al., 2009)                                           | E-cadherin            | IP, IV                    | (Aberle et al., 1994; Knudsen et al., 1992; Sacco et al., 1995; Rubinfeld et al., 1995) |                                                 |
|                      | Pg                   | IP, IV            | (Kowalczyk et al., 1996; Smith and Fuchs, 1998)               |                       |                           |                                                                                         |                                                 |
|                      | Pkp1                 | IV                | (Smith and Fuchs, 1998)                                       | ErbB2                 | IP, IV                    | (Ochai et al., 1994; Kanai et al., 1995)                                                |                                                 |
|                      | Pkp2                 | Y2H, IP           | (Chen et al., 2002)                                           |                       |                           |                                                                                         |                                                 |
|                      | Pkp3                 | IP, IV            | (Bonne et al., 2003)                                          | ICAT                  | Y2H                       | (Rual et al., 2005)                                                                     |                                                 |
|                      | SSSCA1               | IP                | (Ewing et al., 2007)                                          | LGALS9                | IP                        | (Ewing et al., 2007)                                                                    |                                                 |
| Desmoplakin (DP)     | Desmin               | Y2H               | (Meng et al., 1997)                                           | N-cadherin            | IP                        | (Knudsen et al., 1992)                                                                  |                                                 |
|                      | Dsc1                 | IV                | (Smith and Fuchs, 1998)                                       | NFKBIE                | Y2H                       | (Rual et al., 2005)                                                                     |                                                 |
|                      | DP                   | Y2H, IV           | (Choi et al., 2002; Meng et al., 1997)                        | P-cadherin            | IP                        | (Klingelhofer et al., 2000)                                                             |                                                 |
|                      | IKBKE                | IP                | (Bouwmeester et al., 2004)                                    | PECAM-1               | GST, IP                   | (Ilan et al., 2000)                                                                     |                                                 |
|                      | Keratin-1, -8, -18   | Y2H, IV           | (Meng et al., 1997)                                           | PHB2                  | IP                        | (Ewing et al., 2007)                                                                    |                                                 |
|                      | NFKB1, NFKB2, NFKBIB | IP                | (Bouwmeester et al., 2004)                                    | Pg                    | IP, IV                    | (Kowalczyk et al., 1996; Smith and Fuchs, 1998)                                         |                                                 |
|                      | P0071                | Y2H, IP           | (Calkins et al., 2003)                                        | Pkp2                  | Y2H, IP                   | (Chen et al., 2002)                                                                     |                                                 |
|                      | PECAM-1              | IP                | (Ilan et al., 2000)                                           | PTPκ                  | GST, IP                   | (Fuchs et al., 1996)                                                                    |                                                 |
|                      | Pg                   | Y2H, IP           | (Kowalczyk et al., 1997)                                      | PTPRF                 | GST                       | (Aicher et al., 1997)                                                                   |                                                 |
|                      | Pkp1-Pkp3            | Y2H, IP, IV       | (Bonne et al., 2003; Chen et al., 2002; Hofmann et al., 2000) | RIBC2                 | Y2H                       | (Rual et al., 2005)                                                                     |                                                 |
|                      |                      |                   |                                                               | Tcf-4                 | IV                        | (Miravet et al., 2002)                                                                  |                                                 |
|                      | RELB                 | IP                | (Bouwmeester et al., 2004)                                    | VE-cadherin           | IP                        | (Lampugnani et al., 1995)                                                               |                                                 |
|                      | STK24 (STE20)        | IP                | (Ewing et al., 2007)                                          | WDYHV1                | Y2H                       | (Rual et al., 2005)                                                                     |                                                 |
|                      | Vimentin             | Y2H, IV           | (Choi et al., 2002; Meng et al., 1997)                        |                       |                           |                                                                                         |                                                 |
|                      | Plakoglobin (Pg)     | α-catenin         | IV                                                            | (Aberle et al., 1994) | Plakophilin 2 (Pkp2)      | 14-3-3                                                                                  | IP                                              |
| APC                  |                      | Y2H, IP, IV       | (Rubinfeld et al., 1995)                                      |                       | β-catenin                 | Y2H, IP                                                                                 | (Chen et al., 2002)                             |
| ARHGDI1              |                      | Y2H               | (Stelzl et al., 2005)                                         |                       | Cytokeratins 5, 8, 14, 18 | IV                                                                                      | (Hofmann et al., 2000)                          |
| β-TrCP               |                      | IP                | (Sadot et al., 2000)                                          | Dsc1                  | Y2H, IP                   | (Chen et al., 2002)                                                                     |                                                 |
| BIRC2                |                      | Y2H               | (Rual et al., 2005)                                           | Dsc2                  | Y2H, IP                   | (Chen et al., 2002)                                                                     |                                                 |
| DEP1                 |                      | GST               | (Holsinger et al., 2002)                                      | Dsg1                  | Y2H, IP                   | (Chen et al., 2002)                                                                     |                                                 |
|                      |                      |                   |                                                               | Dsg2                  | Y2H, IP                   | (Chen et al., 2002)                                                                     |                                                 |
|                      |                      |                   |                                                               | DP                    | IP                        | (Chen et al., 2002)                                                                     |                                                 |
|                      |                      |                   |                                                               | Pg                    | Y2H, IP                   | (Chen et al., 2002)                                                                     |                                                 |
|                      |                      |                   |                                                               | RPC155                | IP, IV                    | (Mertens et al., 2001)                                                                  |                                                 |
|                      |                      |                   | TFIIIB                                                        | IP                    | (Mertens et al., 2001)    |                                                                                         |                                                 |
|                      |                      |                   | Vimentin                                                      | IV                    | (Hofmann et al., 2000)    |                                                                                         |                                                 |

14-3-3, stratifin; APC, adenomatous polyposis coli; ARHGDI1 (RHOGDI-1), Rho GDP dissociation inhibitor (GDI) alpha; β-TrCP, β-transducin repeat containing; BIRC2, baculoviral IAP repeat-containing 2; DEP1, protein tyrosine phosphatase receptor type J; DF3/MUC1, mucin 1, cell-surface associated; ErbB2, v-erb-b2 erythroblastic leukemia viral oncogene homolog 2, neuro/glioblastoma derived oncogene homolog (avian); GST, glutathione-S-transferase; ICAT, catenin β-interacting protein 1; IKBKE, inhibitor of kappa light polypeptide gene enhancer in B-cells kinase epsilon; IP, immunoprecipitation; IV, in vitro; LGALS9, lectin galactoside-binding soluble 9; NFKB, nuclear factor of kappa light polypeptide gene enhancer in B-cells; NFKBIB, NFKB inhibitor, beta; NFKBIE, NFKB inhibitor epsilon; P0071, plakophilin 4; PECAM-1, platelet/endothelial cell-adhesion molecule; PHB2, prohibitin 2; PTPκ, protein tyrosine phosphatase receptor type κ; PTPRF, protein tyrosine phosphatase receptor type F; RELB, v-rel reticuloendotheliosis viral oncogene homolog B; RIBC2, RIB43A domain with coiled-coils 2; RPC155, DNA-directed RNA polymerase III subunit RPC1; SSSCA1, Sjogren syndrome/scleroderma autoantigen 1; STK24 (STE20), serine/threonine kinase 24 (STE20 homolog, yeast); Tcf-4, transcription factor 4; TFIIIB, B double prime 1 subunit of RNA polymerase III transcription initiation factor IIIB; WDYHV1, WDYHV motif-containing 1; Y2H, yeast two hybrid.

novo assembly of cell-cell junctions in contact-naïve cells, or in response to an increase in extracellular  $Ca^{2+}$ , occurs from distinct cytoplasmic pools of cadherin core and plaque components. Desmosomal cadherins are constitutively synthesized and transported to the membrane, probably in part via long-range microtubule-dependent processes. In response to cell-cell contact, desmosomal cadherins become stabilized and cluster at the cell surface in conjunction with plaque proteins. In addition, DP-enriched precursor particles form in the cytoplasm in response to cell-cell contact. These particles then translocate to nascent

desmosomes to reinforce the plaque in an actin-dependent manner about 30 minutes following contact. A proportion of the cellular pool of Pkp2 associates with these DP precursors and plays an essential role in regulating both the association of DP with IFs and its dynamic behavior. Pkp2 might accomplish this by serving as a scaffold to recruit active PKCα to DP, resulting in DP phosphorylation and conversion to an assembly-competent state. Pkp1 recruits itself to cell-cell interfaces through its C-terminal domain, and DP through its N-terminal domain (Holthofer et al., 2007). By recruiting plaque proteins such as DP,

armadillo family members enhance the structural integrity of cell-cell junctions and have a positive effect on the size and number of desmosomes.

Desmosomes and AJs exhibit a symbiotic relationship: desmosome formation depends on the presence of AJs, whereas the maturation of AJs and the associated cortical actin cytoskeleton depends on functional desmosomes. A variety of structural and signaling mediators are important for this relationship. Armadillo proteins might 'seed' the de novo formation of desmosomes through their ability to associate with both classic and

desmosomal cadherins and subsequently dictate their segregation into distinct junctions in epithelial tissues. Desmosomal-plaque assembly is actin-dependent and might require actin remodeling, which can be triggered by the ligation of classic cadherins. These events are associated with the maturation of AJs and are coordinated with biochemical signaling pathways. For instance, PKC activation can circumvent the requirement for AJs in directing the formation of desmosomes, suggesting a potential role for this protein kinase in mediating crosstalk. Nectin-1, a member of a subfamily of immunoglobulin-like adhesion molecules known to regulate AJs and tight junctions, is also emerging as a potential regulator of desmosome assembly (Barron et al., 2008; Hatsell and Cowin, 2001; Hatzfeld, 2007). Collectively, these observations underscore the interdependency of intercellular junctions from their de novo assembly to their function during tissue homeostasis.

#### Regulation of desmosomal adhesion

The stability of desmosomes in subconfluent or freshly plated cultured cells depends on extracellular  $Ca^{2+}$ . Acute  $Ca^{2+}$  depletion causes the engulfment of desmosomal plaques and associated IFs, whereas protein kinase inhibition prevents loss of adhesion and accompanying internalization (Garrod and Kimura, 2008). In addition, cholinergic receptors, receptor tyrosine kinases, proteolytic processing by ADAM (a disintegrin and metalloproteinase) sheddases and pathogenic pemphigus autoantibodies have all been implicated in junctional destabilization through their capacity to promote desmosomal cadherin internalization and/or to weaken interactions between desmosomal cadherins and IFs (Delva and Kowalczyk, 2009; Grando, 2006; Kottke et al., 2006; Muller et al., 2008; Waschke, 2008). Although PKC $\alpha$  promotes desmosome assembly, its activity is attenuated during junctional maturation, leading to the formation of hyperadhesive  $Ca^{2+}$ -independent desmosomes. In fact, in tissues, most desmosomes exhibit this hyperadhesive state. However, both epithelial sheets in vitro and desmosomes in vivo can convert to a  $Ca^{2+}$ -dependent state after wounding, possibly in response to re-activation of PKC $\alpha$ , which becomes closely associated with the plaque region during this conversion process (Garrod and Kimura, 2008). Although molecular targets of PKC that contribute to this conversion have not been identified, one candidate could be DP, whose solubility and assembly state are regulated by serine phosphorylation (Holthofer et al., 2007). RhoA, of the Rho family of small GTPases, is also implicated in regulating

desmosome-mediated adhesion in patients with pemphigus, who suffer from epidermal blistering caused by circulating autoimmune anti-Dsg antibodies. Antibody-mediated loss of intercellular adhesion is inhibited by specific activation of RhoA, and inactivation of RhoA results in pemphigus-like epidermal splitting (Waschke, 2008). Thus, desmosomes are subject to cues from both the normal tissue environment and pathogenic processes that regulate their assembly state and adhesive strength.

#### Desmosomes in development, differentiation and disease

Desmosomes are crucial for normal morphogenesis during all stages of embryogenesis. Investigation of knockout mice has shown that the lack of several desmosomal components (DP, Dsg2, Dsc3 or Pg) results in early embryonic lethality. In addition, Dsg2 deficiency leads to defects in embryonic stem-cell viability and proliferation, even prior to the appearance of desmosomes, which reveals an adhesion-independent role for this cadherin. Pg- or Pkp2-null mice have lethal defects in embryonic heart development. Hyperproliferative and differentiation disorders have also been reported following expression of dominant-negative desmosomal cadherins or the targeted mis-expression of desmosomal cadherins in the suprabasal layers of the epidermis. These studies reveal the importance of desmosomes as structural mediators of tissue integrity, and demonstrate that they can influence proliferative signaling pathways (Bazzi and Christiano, 2007; Cheng and Koch, 2004; Garrod and Chidgey, 2008; Huber, 2003; Muller et al., 2008; Schmidt and Koch, 2007).

Human diseases show similarities to the deficiencies that have been observed in engineered animal models. Mis-sense, truncation and/or nonsense mutations leading to haplo-insufficiency have been identified in representatives of all major desmosome families, including DP, Pkps, Pg, the desmosomal cadherins and also corneodesmosin (Table 2 and Poster, panel 5). These mutations can lead to skin diseases with symptoms ranging from mild keratodermas to severe lethal acantholysis. An overlapping subset of mutations leads to arrhythmogenic right ventricular cardiomyopathy (ARVC) (McGrath, 2005; Schmidt and Koch, 2007). The pathology of ARVC involves fibrofatty replacement of cardiomyocytes, ventricular arrhythmias, heart failure and sudden death. These outcomes might result from various defects, including abnormal gap-junction function and  $\beta$ -catenin-dependent signaling. For example, Pkp2-deficiency, which accounts for the majority of reported ARVC

cases, results in a loss of plasma-membrane-associated Cx43 and thus might affect electrical coupling of cardiac myocytes (Bass-Zubek et al., 2009). Alterations in  $\beta$ -catenin-dependent signaling in a DP mouse model of ARVC were reported to contribute to a transcriptionally driven conversion to an adipocyte cell fate, possibly owing to aberrant redistribution of DP-associated Pg into the nucleus. Finally, mutations in sarcoplasmic/endoplasmic-reticulum  $Ca^{2+}$  pump gene 2 (*SERCA2*) impair desmosome assembly and lead to loss of cell-cell adhesion in epidermal keratinocytes of Darier's disease patients, consistent with the importance of intracellular  $Ca^{2+}$  homeostasis in desmosome function.

Desmosomal cadherins are also targets of autoimmune antibodies in pemphigus vulgaris (PV) and pemphigus foliaceus (PF) (Table 2). Antibodies directed against the extracellular domains of Dsg1 and Dsg3 lead to epidermal blistering through molecular mechanisms that can involve steric hindrance, endocytic internalization, impaired desmosome assembly and/or the triggering of signaling pathways that cause cell-cell dissociation. Bacterial toxins produced by *Staphylococcus aureus*, which causes the proteolytic removal of the Dsg1 extracellular domain, also result in superficial skin blistering that appears identical to that observed in PF (Payne et al., 2004; Stanley and Amagai, 2006). Both antibody- and toxin-mediated pathogenesis have been replicated in a mouse model using pathogenic and non-pathogenic PF anti-Dsg1 antibodies and exfoliative toxin A, respectively. This blistering phenotype contrasts dramatically with the thickened hyperkeratotic state of the epidermis from human patients with genetic alterations in the same Dsg1 molecule, for reasons that are not fully understood (see Table 2).

Desmosomal cadherins and their associated proteins have been linked with cell proliferation and survival pathways, and might contribute to regulation of tumor-cell growth, invasion and metastasis. Dsgs and their binding partner Pg can sensitize cells to apoptotic stimuli, and Dsg internalization is enhanced by epidermal growth factor receptor (EGFR)- and ADAM-family-dependent Dsg2 ectodomain shedding, which might promote tumor-cell migration. In certain contexts, the overexpression of Pg has been associated with increased chromosomal instability and uncontrolled proliferation via increased protein expression of pituitary-tumor-transforming gene and Myc, whereas in epidermal keratinocytes, it has been demonstrated that Pg is required for suppression of the transcriptional activation of Myc. Finally, the transcription of desmosomal genes is attenuated by factors such as zinc finger E-box

**Table 2. Desmosomal components targeted in human diseases**

| Affected tissues and their associated diseases         | Desmosomal molecules targeted | Clinical manifestation                                                                                                                           | References                                                                                                   |
|--------------------------------------------------------|-------------------------------|--------------------------------------------------------------------------------------------------------------------------------------------------|--------------------------------------------------------------------------------------------------------------|
| <b>Heart defects</b>                                   |                               |                                                                                                                                                  |                                                                                                              |
| Arrhythmogenic right ventricular cardiomyopathy (ARVC) | Pkp2, DP, Dsg2, Pg, Dsc2      | Replacement of right ventricular myocardium with fibrofatty tissue, resulting in thinning of the right ventricular wall and sudden cardiac death | (Gerull et al., 2004; Pilichou et al., 2006; Rampazzo et al., 2002; McKoy et al., 2000; Syrris et al., 2006) |
| Dilated cardiomyopathy (DC)                            | Dsg2, DP                      | Ventricular dilation impairs myocardial function, resulting in heart failure                                                                     | (Posch et al., 2008; Norgett et al., 2000)                                                                   |
| <b>Skin defects</b>                                    |                               |                                                                                                                                                  |                                                                                                              |
| Woolly hair with and without cardiomyopathy            | DP, Dsc2                      | Syndrome of the scalp hair characterized by frizzy and wiry hair, giving it wool-like appearance                                                 | (Norgett et al., 2000; Simpson et al., 2009)                                                                 |
| Striate palmoplantar keratoderma (SPPK)                | DP, Dsg1, Dsc2                | Epidermal thickening of the palms and soles                                                                                                      | (Simpson et al., 2009; Rickman et al., 1999; Armstrong et al., 1999)                                         |
| Skin fragility ectodermal dysplasia syndrome           | Pkp1                          | Thickening of the skin on palms and soles, abnormal nails, and fragile skin that blisters and peels                                              | (McGrath et al., 1997)                                                                                       |
| Naxos diseases                                         | Pg                            | Combination of ARVC, palmoplantar keratosis and woolly hair                                                                                      | (McKoy et al., 2000)                                                                                         |
| Hypotrichosis                                          | Dsg4                          | Sparse, fragile hair with abnormal hair follicles, impaired hair keratinization and epidermal hyperproliferation                                 | (Kljuic et al., 2003)                                                                                        |
| Hypotrichosis with skin vesicles                       | Dsc3                          | Sparse, fragile hair with normal follicles                                                                                                       | (Ayub et al., 2009)                                                                                          |
| Hypotrichosis simplex                                  | Corneodesmosin                | Progressive thinning of scalp hair in first decade; loss of cell-cell adhesion in inner root sheath of hair follicles                            | (Levy-Nissenbaum et al., 2003)                                                                               |
| Pemphigus (foliaceus and vulgaris) (PF and PV)         | Dsg1, Dsg3                    | Autoantibody-mediated disruption of intercellular adhesion (acantholysis) and blistering in the epidermis (PF) and/or oral mucosa (PV)           | (Koulu et al., 1984; Amagai et al., 1991)                                                                    |
| Bullous impetigo                                       | Dsg1                          | Bacterial exfoliative toxin results in the appearance of localized blisters, usually on the trunk, arms or legs                                  | (Amagai et al., 2000)                                                                                        |
| Staphylococcal scalded-skin syndrome (SSSS)            | Dsg1                          | More generalized form of bullous impetigo in which exfoliative toxin leads to widespread superficial skin blistering and exfoliation             | (Amagai et al., 2000)                                                                                        |

binding homeobox 1 (ZEB1) and ZEB2, which regulate epithelial-to-mesenchymal transition and promote tumor invasion and metastasis (Chidgey and Dawson, 2007; Garrod, 1995; Klessner et al., 2008; Muller et al., 2008; Pan et al., 2007).

### Future perspectives

Like AJs, desmosomes are dual regulators of cell adhesion and morphogenesis. Whereas AJs play an active role in tissue remodeling, which involves rearrangements of the actin cytoskeleton, the fact that desmosomes interact with IFs puts them at center stage in the maintenance of tissue integrity. Desmosomes also guide differentiation and morphogenesis in complex tissues. However, we still know surprisingly little about how differentiation-dependent patterns of desmosomal cadherins are controlled via transcriptional regulation, or how these patterns dictate cadherin organization in situ. Studies that aim to define desmosomal cadherin structure and the nature of the proteins that interact with their unique cytoplasmic tails are needed to better understand how they are organized and how they perform their structural and signaling roles. Recent advances in genetic and proteomic screening will facilitate future progress in these areas, whereas advances in optical imaging promise to provide insights into the assembly pathways that govern the dynamics of these insoluble organelles. Finally, coupling these state-of-the-art strategies with electrophysiological approaches will further our

understanding of the mechanisms that lead to cardiac disease caused by desmosome defects.

We would like to thank Spiro Getsios and Viktor Todorović for critically reading the manuscript. Due to space limitation only recent articles not yet covered in reviews were cited individually, and we apologize to our colleagues whose work was not cited directly. Work in the authors' laboratory is supported by grants from the Leducq Foundation and NIH (NIAMS and NCI) (K.J.G.), the Tiecke-Sowers Fellowship in Pathology (B.V.D.) and T32 GM08061 and AHA grant 09PRE2060308 (R.M.H.). Deposited in PMC for release after 12 months.

### References

Aberle, H., Butz, S., Stappert, J., Weissig, H., Kemler, R. and Hoshuetzky, H. (1994). Assembly of the cadherin-catenin complex in vitro with recombinant proteins. *J. Cell Sci.* **107**, 3655-3663.

Aicher, B., Lerch, M. M., Muller, T., Schilling, J. and Ullrich, A. (1997). Cellular redistribution of protein tyrosine phosphatases LAR and PTPsigma by inducible proteolytic processing. *J. Cell Biol.* **138**, 681-696.

Amagai, M., Klaus-Kovtun, V. and Stanley, J. R. (1991). Autoantibodies against a novel epithelial cadherin in pemphigus vulgaris, a disease of cell adhesion. *Cell* **67**, 869-877.

Amagai, M., Matsuyoshi, N., Wang, Z. H., Andl, C. and Stanley, J. R. (2000). Toxin in bullous impetigo and staphylococcal scalded-skin syndrome targets desmoglein 1. *Nat. Med.* **6**, 1275-1277.

Armstrong, D. K., McKenna, K. E., Purkis, P. E., Green, K. J., Eady, R. A., Leigh, I. M. and Hughes, A. E. (1999). Haploinsufficiency of desmoplakin causes a striate subtype of palmoplantar keratoderma. *Hum. Mol. Genet.* **8**, 143-148.

Ayub, M., Basit, S., Jelani, M., Ur Rehman, F., Iqbal, M., Yasin, M. and Ahmad, W. (2009). A homozygous nonsense mutation in the human desmocollin-3 (DSC3) gene underlies hereditary hypotrichosis and recurrent skin vesicles. *Am. J. Hum. Genet.* **85**, 515-520.

Bannon, L. J., Cabrera, B. L., Stack, M. S. and Green, K. J. (2001). Isoform-specific differences in the size of

desmosomal cadherin/catenin complexes. *J. Invest. Dermatol.* **117**, 1302-1306.

Barron, M. J., Brookes, S. J., Draper, C. E., Garrod, D., Kirkham, J., Shore, R. C. and Dixon, M. J. (2008). The cell adhesion molecule nectin-1 is critical for normal enamel formation in mice. *Hum. Mol. Genet.* **17**, 3509-3520.

Bass-Zubek, A. E., Hobbs, R. P., Amargo, E. V., Garcia, N. J., Hsieh, S. N., Chen, X., Wahl, J. K., 3rd, Denning, M. F. and Green, K. J. (2008). Plakophilin 2, a critical scaffold for PKC alpha that regulates intercellular junction assembly. *J. Cell Biol.* **181**, 605-613.

Bass-Zubek, A. E., Godsel, L. M., Delmar, M. and Green, K. J. (2009). Plakophilins: multifunctional scaffolds for adhesion and signaling. *Curr. Opin. Cell Biol.* **5**, 708-716.

Bazzi, H. and Christiano, A. M. (2007). Broken hearts, woolly hair, and tattered skin: when desmosomal adhesion goes awry. *Curr. Opin. Cell Biol.* **19**, 515-520.

Benzinger, A., Muster, N., Koch, H. B., Yates, J. R., 3rd and Hermeking, H. (2005). Targeted proteomic analysis of 14-3-3 sigma, a p53 effector commonly silenced in cancer. *Mol. Cell Proteomics* **4**, 785-795.

Bonne, S., Gilbert, B., Hatzfeld, M., Chen, X., Green, K. J. and van Roy, F. (2003). Defining desmosomal plakophilin-3 interactions. *J. Cell Biol.* **161**, 403-416.

Bouwmeester, T., Bauch, A., Ruffner, H., Angrand, P. O., Bergamini, G., Croughton, K., Cruciat, C., Eberhard, D., Gagneur, J., Ghidelli, S. et al. (2004). A physical and functional map of the human TNF-alpha/NF-kappa B signal transduction pathway. *Nat. Cell Biol.* **6**, 97-105.

Calkins, C. C., Hoepner, B. L., Law, C. M., Novak, M. R., Setzer, S. V., Hatzfeld, M. and Kowalczyk, A. P. (2003). The Armadillo family protein p0071 is a VE-cadherin- and desmoplakin-binding protein. *J. Biol. Chem.* **278**, 1774-1783.

Chen, X., Bonne, S., Hatzfeld, M., van Roy, F. and Green, K. J. (2002). Protein binding and functional characterization of plakophilin 2. Evidence for its diverse roles in desmosomes and beta-catenin signaling. *J. Biol. Chem.* **277**, 10512-10522.

Cheng, X. and Koch, P. J. (2004). In vivo function of desmosomes. *J. Dermatol.* **31**, 171-187.

Cheng, X., Mihindukulasuriya, K., Den, Z., Kowalczyk, A. P., Calkins, C. C., Ishiko, A., Shimizu, A. and Koch, P. J. (2004). Assessment of splice variant-specific functions of desmocollin 1 in the skin. *Mol. Cell Biol.* **24**, 154-163.

- Chidgey, M. and Dawson, C. (2007). Desmosomes: a role in cancer? *Brit. J. Cancer* **96**, 1783-1787.
- Chitaev, N. A. and Troyanovsky, S. M. (1997). Direct Ca<sup>2+</sup>-dependent heterophilic interaction between desmosomal cadherins, desmoglein and desmocollin, contributes to cell-cell adhesion. *J. Cell Biol.* **138**, 193-201.
- Choi, H. J., Park-Snyder, S., Pascoe, L. T., Green, K. J. and Weis, W. I. (2002). Structures of two intermediate filament-binding fragments of desmoplakin reveal a unique repeat motif structure. *Nat. Struct. Biol.* **9**, 612-620.
- Delva, E. and Kowalczyk, A. P. (2009). Regulation of cadherin trafficking. *Traffic* **10**, 259-267.
- Dusek, R. L., Godsel, L. M. and Green, K. J. (2007). Discriminating roles of desmosomal cadherins: beyond desmosomal adhesion. *J. Dermatol. Sci.* **45**, 7-21.
- Ewing, R. M., Chu, P., Elisma, F., Li, H., Taylor, P., Cimie, S., McBroom-Cerajewski, L., Robinson, M. D., O'Connor, L., Li, M. et al. (2007). Large-scale mapping of human protein-protein interactions by mass spectrometry. *Mol. Syst. Biol.* **3**, 89.
- Fuchs, M., Muller, T., Lerch, M. M. and Ullrich, A. (1996). Association of human protein-tyrosine phosphatase kappa with members of the armadillo family. *J. Biol. Chem.* **271**, 16712-16719.
- Garrod, D. R. (1995). Desmosomes and cancer. *Cancer Surveys* **24**, 97-111.
- Garrod, D. and Chidgey, M. (2008). Desmosome structure, composition and function. *Biochim. Biophys. Acta* **1778**, 572-587.
- Garrod, D. and Kimura, T. E. (2008). Hyper-adhesion: a new concept in cell-cell adhesion. *Biochem. Soc. Trans.* **36**, 195-201.
- Gerull, B., Heuser, A., Wichter, T., Paul, M., Basson, C. T., McDermott, D. A., Lerman, B. B., Markowitz, S. M., Ellinor, P. T., MacRae, C. A. et al. (2004). Mutations in the desmosomal protein plakophilin-2 are common in arrhythmogenic right ventricular cardiomyopathy. *Nat. Genet.* **36**, 1162-1164.
- Getsios, S., Huen, A. C. and Green, K. J. (2004). Working out the strength and flexibility of desmosomes. *Nat. Rev. Mol. Cell Biol.* **5**, 271-281.
- Grando, S. A. (2006). Cholinergic control of epidermal cohesion. *Exp. Dermatol.* **15**, 265-282.
- Green, K. J. and Gaudry, C. A. (2000). Are desmosomes more than tethers for intermediate filaments? *Nat. Rev. Mol. Cell Biol.* **1**, 208-216.
- Green, K. J. and Simpson, C. L. (2007). Desmosomes: new perspectives on a classic. *J. Invest. Dermatol.* **127**, 2499-2515.
- Hanakawa, Y., Amagai, M., Shirakata, Y., Sayama, K. and Hashimoto, K. (2000). Different effects of dominant negative mutants of desmocollin and desmoglein on the cell-cell adhesion of keratinocytes. *J. Cell Sci.* **113**, 1803-1811.
- Hatsell, S. and Cowin, P. (2001). Deconstructing desmoplakin. *Nat. Cell Biol.* **3**, E270-272.
- Hatzfeld, M. (2007). Plakophilins: Multifunctional proteins or just regulators of desmosomal adhesion? *Biochim. Biophys. Acta* **1773**, 69-77.
- Hofmann, I., Mertens, C., Brettel, M., Nimmrich, V., Schnolzer, M. and Herrmann, H. (2000). Interaction of plakophilins with desmoplakin and intermediate filament proteins: an in vitro analysis. *J. Cell Sci.* **113**, 2471-2483.
- Hofmann, I., Schlechter, T., Kuhn, C., Hergt, M. and Franke, W. W. (2009). Protein p0071-an armadillo plaque protein that characterizes a specific subtype of adherens junctions. *J. Cell Sci.* **122**, 21-24.
- Holsinger, L. J., Ward, K., Duffield, B., Zachwieja, J. and Jallal, B. (2002). The transmembrane receptor protein tyrosine phosphatase DEP1 interacts with p120(ctn). *Oncogene* **21**, 7067-7076.
- Holthofer, B., Windoffer, R., Troyanovsky, S. and Leube, R. E. (2007). Structure and function of desmosomes. *Int. Rev. Cytol.* **264**, 65-163.
- Huber, O. (2003). Structure and function of desmosomal proteins and their role in development and disease. *Cell. Mol. Life Sci.* **60**, 1872-1890.
- Ilan, N., Cheung, L., Pinter, E. and Madri, J. A. (2000). Platelet-endothelial cell adhesion molecule-1 (CD31), a scaffolding molecule for selected catenin family members whose binding is mediated by different tyrosine and serine/threonine phosphorylation. *J. Biol. Chem.* **275**, 21435-21443.
- Kami, K., Chidgey, M., Dafforn, T. and Overduin, M. (2009). The desmoglein-specific cytoplasmic region is intrinsically disordered in solution and interacts with multiple desmosomal protein partners. *J. Mol. Biol.* **386**, 531-543.
- Kanai, Y., Ochiai, A., Shibata, T., Oyama, T., Ushijima, S., Akimoto, S. and Hirohashi, S. (1995). c-erbB-2 gene product directly associates with beta-catenin and plakoglobin. *Biochem. Biophys. Res. Comm.* **208**, 1067-1072.
- Keil, R., Wolf, A., Huttelmaier, S. and Hatzfeld, M. (2007). Beyond regulation of cell adhesion: local control of RhoA at the cleavage furrow by the p0071 catenin. *Cell Cycle* **6**, 122-127.
- Klessner, J. L., Desai, B. V., Amargo, E. V., Getsios, S. and Green, K. J. (2008). EGFR and ADAMs cooperate to regulate shedding and endocytic trafficking of the desmosomal cadherin desmoglein 2. *Mol. Biol. Cell* **1**, 328-337.
- Klingelhofer, J., Troyanovsky, R. B., Laur, O. Y. and Troyanovsky, S. (2000). Amino-terminal domain of classic cadherins determines the specificity of the adhesive interactions. *J. Cell Sci.* **113**, 2829-2836.
- Kljuic, A., Bazzi, H., Sundberg, J. P., Martinez-Mir, A., O'Shaughnessy, R., Mahoney, M. G., Levy, M., Montagutelli, X., Ahmad, W., Aita, V. M. et al. (2003). Desmoglein 2 in hair follicle differentiation and epidermal adhesion: evidence from inherited hypotrichosis and acquired pemphigus vulgaris. *Cell* **113**, 249-260.
- Knudsen, K. A. and Wheelock, M. J. (1992). Plakoglobin, or an 83-kD homologue distinct from beta-catenin, interacts with E-cadherin and N-cadherin. *J. Cell Biol.* **118**, 671-679.
- Kottke, M. D., Delva, E. and Kowalczyk, A. P. (2006). The desmosome: cell science lessons from human diseases. *J. Cell Sci.* **119**, 797-806.
- Koulu, L., Kusumi, A., Steinberg, M. S., Klaus-Kovtun, V. and Stanley, J. R. (1984). Human autoantibodies against a desmosomal core protein in pemphigus foliaceus. *J. Exp. Med.* **160**, 1509-1518.
- Kowalczyk, A. P., Stappenbeck, T. S., Parry, D. A., Palka, H. L., Virata, M. L., Bornslaeger, E. A., Nilles, L. A. and Green, K. J. (1994). Structure and function of desmosomal transmembrane core and plaque molecules. *Biophys. Chem.* **50**, 97-112.
- Kowalczyk, A. P., Borgwardt, J. E. and Green, K. J. (1996). Analysis of desmosomal cadherin-adhesive function and stoichiometry of desmosomal cadherin-plakoglobin complexes. *J. Invest. Dermatol.* **107**, 293-300.
- Kowalczyk, A. P., Bornslaeger, E. A., Borgwardt, J. E., Palka, H. L., Dhaliwal, A. S., Corcoran, C. M., Denning, M. F. and Green, K. J. (1997). The amino-terminal domain of desmoplakin binds to plakoglobin and clusters desmosomal cadherin-plakoglobin complexes. *J. Cell Biol.* **139**, 773-784.
- Lampugnani, M. G., Corada, M., Caveda, L., Breviario, F., Ayalon, O., Geiger, B. and Dejana, E. (1995). The molecular organization of endothelial cell to cell junctions: differential association of plakoglobin, beta-catenin, and alpha-catenin with vascular endothelial cadherin (VE-cadherin). *J. Cell Biol.* **129**, 203-217.
- Lechler, T. and Fuchs, E. (2007). Desmoplakin: an unexpected regulator of microtubule organization in the epidermis. *J. Cell Biol.* **176**, 147-154.
- Levy-Nissenbaum, E., Betz, R. C., Frydman, M., Simon, M., Lahat, H., Bakhan, T., Goldman, B., Bygum, A., Pierick, M., Hillmer, A. M. et al. (2003). Hypotrichosis simplex of the scalp is associated with nonsense mutations in CDSN encoding corneodesmosin. *Nat. Genet.* **34**, 151-153.
- McGrath, J. A. (2005). Inherited disorders of desmosomes. *Austral. J. Dermatol.* **46**, 221-229.
- McGrath, J. A., McMillan, J. R., Shemanko, C. S., Runswick, S. K., Leigh, I. M., Lane, E. B., Garrod, D. R. and Eady, R. A. (1997). Mutations in the plakophilin 1 gene result in ectodermal dysplasia/skin fragility syndrome. *Nat. Genet.* **17**, 240-244.
- McKoy, G., Protonotarios, N., Crosby, A., Tsatopoulou, A., Anastasakis, A., Coonar, A., Norman, M., Baboonian, C., Jeffery, S. and McKenna, W. J. (2000). Identification of a deletion in plakoglobin in arrhythmogenic right ventricular cardiomyopathy with palmoplantar keratoderma and woolly hair (Naxos disease). *Lancet* **355**, 2119-2124.
- Meng, J. J., Bornslaeger, E. A., Green, K. J., Steinert, P. M. and Ip, W. (1997). Two-hybrid analysis reveals fundamental differences in direct interactions between desmoplakin and cell type-specific intermediate filaments. *J. Biol. Chem.* **272**, 21495-21503.
- Mertens, C., Hofmann, I., Wang, Z., Teichmann, M., Sepehri Chong, S., Schnolzer, M. and Franke, W. W. (2001). Nuclear particles containing RNA polymerase III complexes associated with the junctional plaque protein plakophilin 2. *Proc. Natl. Acad. Sci. USA* **98**, 7795-7800.
- Miravet, S., Piedra, J., Miro, F., Itarte, E., Garcia de Herreros, A. and Dunach, M. (2002). The transcriptional factor Tcf-4 contains different binding sites for beta-catenin and plakoglobin. *J. Biol. Chem.* **277**, 1884-1891.
- Muller, E. J., Williamson, L., Kolly, C. and Suter, M. M. (2008). Outside-in signaling through integrins and cadherins: a central mechanism to control epidermal growth and differentiation? *J. Invest. Dermatol.* **128**, 501-516.
- Norgett, E. E., Hatsell, S. J., Carvajal-Huerta, L., Cabezas, J. C., Common, J., Purkis, P. E., Whitlock, N., Leigh, I. M., Stevens, H. P. and Kelsell, D. P. (2000). Recessive mutation in desmoplakin disrupts desmoplakin-intermediate filament interactions and causes dilated cardiomyopathy, woolly hair and keratoderma. *Hum. Mol. Genet.* **9**, 2761-2766.
- Ochiai, A., Akimoto, S., Kanai, Y., Shibata, T., Oyama, T. and Hirohashi, S. (1994). c-erbB-2 gene product associates with catenins in human cancer cells. *Biochem. Biophys. Res. Comm.* **205**, 73-78.
- Ozawa, M., Terada, H. and Pedraza, C. (1995). The fourth armadillo repeat of plakoglobin (gamma-catenin) is required for its high affinity binding to the cytoplasmic domains of E-cadherin and desmosomal cadherin Dsg2, and the tumor suppressor APC protein. *J. Biochem.* **118**, 1077-1082.
- Payne, A. S., Hanakawa, Y., Amagai, M. and Stanley, J. R. (2004). Desmosomes and disease: pemphigus and bullous impetigo. *Curr. Opin. Cell Biol.* **16**, 536-543.
- Pilichou, K., Nava, A., Basso, C., Beffagna, G., Bauce, B., Lorenzon, A., Frigo, G., Vettori, A., Valente, M., Towbin, J. et al. (2006). Mutations in desmoglein-2 gene are associated with arrhythmogenic right ventricular cardiomyopathy. *Circulation* **113**, 1171-1179.
- Posch, M. G., Posch, M. J., Geier, C., Erdmann, B., Mueller, W., Richter, A., Ruppert, V., Pankuweit, S., Maisch, B., Perrot, A. et al. (2008). A missense variant in desmoglein-2 predisposes to dilated cardiomyopathy. *Mol. Genet. Metab.* **95**, 74-80.
- Rampazzo, A., Nava, A., Malacrida, S., Beffagna, G., Bauce, B., Rossi, V., Zimbello, R., Simonati, B., Basso, C., Thiene, G. et al. (2002). Mutation in human desmoplakin domain binding to plakoglobin causes a dominant form of arrhythmogenic right ventricular cardiomyopathy. *Am. J. Hum. Genet.* **71**, 1200-1206.
- Rickman, L., Simrak, D., Stevens, H. P., Hunt, D. M., King, I. A., Bryant, S. P., Eady, R. A., Leigh, I. M., Arnemann, J., Magee, A. I. et al. (1999). N-terminal deletion in a desmosomal cadherin causes the autosomal dominant skin disease striate palmoplantar keratoderma. *Hum. Mol. Genet.* **8**, 971-976.
- Roh, J. Y. and Stanley, J. R. (1995). Plakoglobin binding by human Dsg3 (pemphigus vulgaris antigen) in keratinocytes requires the cadherin-like intracytoplasmic segment. *J. Invest. Dermatol.* **104**, 720-724.
- Rual, J. F., Venkatesan, K., Hao, T., Hirozane-Kishikawa, T., Dricot, A., Li, N., Berriz, G. F., Gibbons, F. D., Dreze, M., Ayivi-Guedehoussou, N. et al. (2005). Towards a proteome-scale map of the human protein-protein interaction network. *Nature* **437**, 1173-1178.
- Rubinfield, B., Souza, B., Albert, I., Munemitsu, S. and Polakis, P. (1995). The APC protein and E-cadherin form similar but independent complexes with alpha-catenin, beta-catenin, and plakoglobin. *J. Biol. Chem.* **270**, 5549-5555.
- Sacco, P. A., McGranahan, T. M., Wheelock, M. J. and Johnson, K. R. (1995). Identification of plakoglobin domains required for association with N-cadherin and alpha-catenin. *J. Biol. Chem.* **270**, 20201-20206.
- Sadot, E., Simcha, I., Iwai, K., Ciechanover, A., Geiger, B. and Ben-Ze'ev, A. (2000). Differential interaction of plakoglobin and beta-catenin with the ubiquitin-proteasome system. *Oncogene* **19**, 1992-2001.
- Schmidt, A. and Koch, P. J. (2007). Desmosomes: just cell adhesion or is there more? *Cell Adh. Migr.* **1**, 28-32.

- Simpson, M. A., Mansour, S., Ahnood, D., Kalidas, K., Patton, M. A., McKenna, W. J., Behr, E. R. and Crosby, A. H. (2009). Homozygous mutation of desmocollin-2 in arrhythmogenic right ventricular cardiomyopathy with mild palmoplantar keratoderma and woolly hair. *Cardiology* **113**, 28-34.
- Smith, E. A. and Fuchs, E. (1998). Defining the interactions between intermediate filaments and desmosomes. *J. Cell Biol.* **141**, 1229-1241.
- Sonnenberg, A. and Liem, R. K. (2007). Plakins in development and disease. *Exp. Cell Res.* **313**, 2189-2203.
- Stanley, J. R. and Amagai, M. (2006). Pemphigus, bullous impetigo, and the staphylococcal scalded-skin syndrome. *N. Engl. J. Med.* **355**, 1800-1810.
- Stappenbeck, T. S., Lamb, J. A., Corcoran, C. M. and Green, K. J. (1994). Phosphorylation of the desmoplakin COOH terminus negatively regulates its interaction with keratin intermediate filament networks. *J. Biol. Chem.* **269**, 29351-29354.
- Stelzl, U., Worm, U., Lalowski, M., Haenig, C., Brembeck, F. H., Goehler, H., Stroedicke, M., Zenkner, M., Schoenherr, A., Koeppen, S. et al. (2005). A human protein-protein interaction network: a resource for annotating the proteome. *Cell* **122**, 957-968.
- Syrris, P., Ward, D., Evans, A., Asimaki, A., Gandjbakhch, E., Sen-Chowdhry, S. and McKenna, W. J. (2006). Arrhythmogenic right ventricular dysplasia/cardiomyopathy associated with mutations in the desmosomal gene desmocollin-2. *Am. J. Hum. Genet.* **79**, 978-984.
- Troyanovsky, S. M., Troyanovsky, R. B., Eshkind, L. G., Leube, R. E. and Franke, W. W. (1994). Identification of amino acid sequence motifs in desmocollin, a desmosomal glycoprotein, that are required for plakoglobin binding and plaque formation. *Proc. Natl. Acad. Sci. USA* **91**, 10790-10794.
- Wan, H., South, A. P. and Hart, I. R. (2007). Increased keratinocyte proliferation initiated through downregulation of desmoplakin by RNA interference. *Exp. Cell Res.* **313**, 2336-2344.
- Waschke, J. (2008). The desmosome and pemphigus. *Histochem. Cell Biol.* **130**, 21-54.
- Witcher, L. L., Collins, R., Puttagunta, S., Mechanic, S. E., Munson, M., Gumbiner, B. and Cowin, P. (1996). Desmosomal cadherin binding domains of plakoglobin. *J. Biol. Chem.* **271**, 10904-10909.
- Yamamoto, M., Bharti, A., Li, Y. and Kufe, D. (1997). Interaction of the DF3/MUC1 breast carcinoma-associated antigen and beta-catenin in cell adhesion. *J. Biol. Chem.* **272**, 12492-12494.

**Cell Science at a Glance on the Web**  
Electronic copies of the poster insert are available in the online version of this article at [jcs.biologists.org](http://jcs.biologists.org). The JPEG images can be downloaded for printing or used as slides.

## Commentaries and Cell Science at a Glance

JCS Commentaries highlight and critically discuss recent and exciting findings that will interest those who work in cell biology, molecular biology, genetics and related disciplines, whereas Cell Science at a Glance poster articles are short primers that act as an introduction to an area of cell biology, and include a large poster and accompanying text.

Both of these article types, designed to appeal to specialists and nonspecialists alike, are commissioned from leading figures in the field and are subject to rigorous peer-review and in-house editorial appraisal. Each issue of the journal usually contains at least one of each article type. JCS thus provides readers with more than 50 topical pieces each year, which cover the complete spectrum of cell science. The following are just some of the areas that will be covered in JCS over the coming months:

### Cell Science at a Glance

- Actin and cellular architecture at a glance *Buzz Baum*
- The catenin family at a glance *Pierre McCrea*
- The primary cilium at a glance *Peter Satir*
- The nuclear envelope: a long view *Kathy Wilson*

### Commentaries

- Crosstalk between GlcNAcylation and phosphorylation *Gerald Hart*
- Cryo-electron tomography *Ohad Medalia*
- Matrix elasticity, cytoskeletal forces and physics of the nucleus *Dennis Discher*
- Flagellar and ciliary beating *Charles Lindemann*
- Assembly and resorption of the primary cilium *Maxence Nachury*

Although we discourage the submission of unsolicited Commentaries and Cell Science at a Glance poster articles to the journal, ideas for future articles – in the form of a short proposal and some key references – are welcome and should be sent by email to the Editorial Office ([jcs@biologists.com](mailto:jcs@biologists.com)).

*Journal of Cell Science*  
Bidder Building, 140 Cowley Road,  
Cambridge CB4 0DL, UK

E-mail: [jcs@biologists.com](mailto:jcs@biologists.com)  
Website: <http://jcs.biologists.org>
